# Supplementary material
Source: PubMed Central journal article supplement (PMC2072074)
Supplement: biophysj_107.110031_1.pdf [file biophysj_107.110031_1.pdf]

| Parameter  | Model Value           | Range From            | Range To              | Units               |
|------------|-----------------------|-----------------------|-----------------------|---------------------|
| $Ca$       | $1.00 \times 10^{-1}$ | $1.82 \times 10^{-2}$ | $1.82 \times 10^{-1}$ | $\mu M$             |
| $G_d$      | 10000                 | 1820                  | 18200                 | $\mu m^{-2}$        |
| $G_t$      | 0.00                  | Fixed                 | Fixed                 | $\mu m^{-2}$        |
| $IP3$      | $1.50 \times 10^{-2}$ | Fixed                 | Fixed                 | $\mu M$             |
| $k_{f,1}$  | $3.00 \times 10^{-4}$ | $5.45 \times 10^{-5}$ | $5.45 \times 10^{-4}$ | $\mu M^{-1} s^{-1}$ |
| $K_{d,1}$  | $3.00 \times 10^{-5}$ | $5.45 \times 10^{-6}$ | $5.45 \times 10^{-6}$ | $\mu M$             |
| $k_{f,2}$  | $2.75 \times 10^{-4}$ | $5.00 \times 10^{-5}$ | $5.00 \times 10^{-4}$ | $\mu m^2 s^{-1}$    |
| $K_{d,2}$  | 27500                 | 5000                  | 50000                 | $\mu m^{-2}$        |
| $k_{f,3}$  | 1.00                  | $1.82 \times 10^{-1}$ | 1.82                  | $\mu m^2 s^{-1}$    |
| $k_{r,3}$  | $1.00 \times 10^{-3}$ | $1.82 \times 10^{-4}$ | $1.82 \times 10^{-3}$ | $s^{-1}$            |
| $k_{f,4}$  | $3.00 \times 10^{-1}$ | $5.45 \times 10^{-2}$ | $5.45 \times 10^{-1}$ | $\mu M^{-1} s^{-1}$ |
| $K_{d,4}$  | $3.00 \times 10^{-5}$ | $5.45 \times 10^{-6}$ | $5.45 \times 10^{-5}$ | $\mu M$             |
| $k_{f,5}$  | $4.00 \times 10^{-4}$ | $7.27 \times 10^{-5}$ | $7.27 \times 10^{-4}$ | $s^{-1}$            |
| $k_{f,6}$  | 1.00                  | $1.82 \times 10^{-1}$ | 1.82                  | $s^{-1}$            |
| $k_{f,7}$  | $1.50 \times 10^{-1}$ | $2.73 \times 10^{-2}$ | $2.73 \times 10^{-1}$ | $s^{-1}$            |
| $k_{f,8}$  | $1.67 \times 10^{-2}$ | $3.04 \times 10^{-3}$ | $3.04 \times 10^{-2}$ | $\mu M^{-1} s^{-1}$ |
| $k_{r,8}$  | $1.67 \times 10^{-2}$ | $3.04 \times 10^{-3}$ | $3.04 \times 10^{-2}$ | $s^{-1}$            |
| $k_{f,9}$  | $4.20 \times 10^{-3}$ | $7.64 \times 10^{-4}$ | $7.64 \times 10^{-3}$ | $\mu m^2 s^{-1}$    |
| $k_{r,9}$  | 1.00                  | $1.82 \times 10^{-1}$ | 1.82                  | $s^{-1}$            |
| $k_{f,10}$ | $4.20 \times 10^{-2}$ | $7.64 \times 10^{-3}$ | $7.64 \times 10^{-2}$ | $\mu m^2 s^{-1}$    |
| $k_{r,10}$ | 1.00                  | $1.82 \times 10^{-1}$ | 1.82                  | $s^{-1}$            |
| $k_{f,11}$ | $3.34 \times 10^{-2}$ | $6.07 \times 10^{-3}$ | $6.07 \times 10^{-2}$ | $\mu M^{-1} s^{-1}$ |
| $K_{d,11}$ | $1.00 \times 10^{-1}$ | $1.82 \times 10^{-2}$ | $1.82 \times 10^{-1}$ | $\mu M$             |
| $k_{f,12}$ | 6.00                  | 1.09                  | 10.9                  | $s^{-1}$            |
| $k_{f,13}$ | 6.00                  | 1.09                  | 10.9                  | $s^{-1}$            |
| $k_{f,14}$ | $4.44 \times 10^{-1}$ | $8.07 \times 10^{-2}$ | $8.07 \times 10^{-1}$ | $s^{-1}$            |
| $K_{m,14}$ | 19.8                  | 3.60                  | 36.0                  | $\mu M$             |
| $k_{f,15}$ | 3.80                  | $6.91 \times 10^{-1}$ | 6.91                  | $s^{-1}$            |
| $K_{m,15}$ | 5.00                  | $9.09 \times 10^{-1}$ | 9.09                  | $\mu M$             |
| $k_{f,16}$ | 1.25                  | $2.27 \times 10^{-1}$ | 2.27                  | $s^{-1}$            |
| $L_s$      | $1 \times 10^{-1}$    | $1.82 \times 10^{-2}$ | $1.82 \times 10^{-1}$ | $\mu M$             |
| $P$        | 90.9                  | 16.5                  | 165                   | $\mu m^{-2}$        |
| $P_c$      | 9.09                  | 1.65                  | 16.5                  | $\mu m^{-2}$        |
| $P_{cg}$   | 0.00                  | Fixed                 | Fixed                 | $\mu m^{-2}$        |
| $P_g$      | 0.00                  | Fixed                 | Fixed                 | $\mu m^{-2}$        |
| $PIP2$     | 4000                  | 727                   | 7270                  | $\mu m^{-2}$        |
| $R$        | 13.9                  | 2.53                  | 25.3                  | $\mu m^{-2}$        |
| $R_g$      | 5.06                  | 0.920                 | 9.20                  | $\mu m^{-2}$        |
| $R_l$      | 0.00                  | Fixed                 | Fixed                 | $\mu m^{-2}$        |
| $R_{lg}$   | 0.00                  | Fixed                 | Fixed                 | $\mu m^{-2}$        |
| $R_{lgp}$  | 0.00                  | Fixed                 | Fixed                 | $\mu m^{-2}$        |
| $R_{pc}$   | 4.61                  | $8.38 \times 10^{-1}$ | 8.38                  | $\mu m^{-1}$        |
| $V_c$      | 2550                  | 464                   | 4640                  | $\mu m^3$           |

Table S1: IP3 model sensitivity analysis parameters and ranges
