# Supplementary material
Source: PubMed Central journal article supplement (PMC2072074)
Supplement: biophysj_107.110031_2.pdf [file biophysj_107.110031_2.pdf]

| Parameter  | $\mu^*$ (3 s.f.)<br>$\mu M$ | Proportionality |
|------------|-----------------------------|-----------------|
| $k_{f,16}$ | $4.54 \times 10^{-2}$       | (-)             |
| $R_{pc}$   | $4.35 \times 10^{-2}$       | (+)             |
| $k_{f,14}$ | $3.72 \times 10^{-2}$       | (+)             |
| $k_{r,8}$  | $1.93 \times 10^{-2}$       | (-)             |
| $k_{r,8}$  | $1.92 \times 10^{-2}$       | (+)             |
| $P$        | $1.87 \times 10^{-2}$       | (+)             |
| $P_c$      | $1.83 \times 10^{-2}$       | (+)             |
| $Ca$       | $1.83 \times 10^{-2}$       | (+)             |
| $PIP2$     | $1.39 \times 10^{-2}$       | (+)             |
| $K_{m,14}$ | $1.38 \times 10^{-2}$       | (-)             |

Table S2: Model sensitivity analysis results: Baseline Concentration The full list of significant parameters is given. Parameters are ranked by  $\mu^*$ . Additionally, a column depicting whether the parameter is proportional (+) or inversely proportional (-) to the objective function is supplied. The measure of proportionality is taken from the sign of  $\mu$ , hence reveals the effect of the parameter on the objective function direction on average across all tests.
