# Supplementary material
Source: PubMed Central journal article supplement (PMC2072074)
Supplement: biophysj_107.110031_3.pdf [file biophysj_107.110031_3.pdf]

| Parameter  | $\mu^*$ (3 s.f.) | Proportionality |
|------------|------------------|-----------------|
|            | <i>s</i>         |                 |
| $L_s$      | 971              | (-)             |
| $k_{f,4}$  | 953              | (-)             |
| $G_d$      | 725              | (-)             |
| $K_{d,2}$  | 630              | (+)             |
| $k_{f,5}$  | 533              | (-)             |
| $k_{f,8}$  | 23.5             | (-)             |
| $P$        | 19.7             | (-)             |
| $k_{r,8}$  | 13.8             | (-)             |
| $k_{f,15}$ | 11.3             | (-)             |
| $k_{f,12}$ | 10.9             | (-)             |
| $k_{f,6}$  | 10.8             | (+)             |
| $R_{pc}$   | 10.4             | (-)             |
| $k_{f,14}$ | 9.36             | (+)             |
| $R$        | 8.60             | (+)             |
| $k_{f,1}$  | 8.54             | (-)             |
| $k_{f,10}$ | 6.62             | (-)             |
| $K_{d,11}$ | 6.43             | (-)             |
| $k_{f,11}$ | 6.24             | (-)             |
| $K_{m,14}$ | 5.36             | (-)             |
| $Ca$       | 5.34             | (-)             |
| $k_{f,9}$  | 5.28             | (-)             |
| $P_c$      | 5.15             | (-)             |
| $k_{f,7}$  | 4.14             | (-)             |
| $k_{f,13}$ | 3.81             | (-)             |
| $R_g$      | 2.73             | (+)             |
| $k_{f,16}$ | 2.43             | (-)             |
| $PIP2$     | 2.41             | (+)             |
| $k_{f,2}$  | 2.29             | (-)             |
| $K_{m,15}$ | 2.19             | (+)             |
| $K_{d,4}$  | 1.53             | (-)             |
| $k_{r,10}$ | 1.42             | (-)             |

---

Table S3: Model sensitivity analysis results: Time-to-Peak The full list of significant parameters is given. Parameters are ranked by  $\mu^*$ . Additionally, a column depicting whether the parameter is proportional (+) or inversely proportional (-) to the objective function is supplied. The measure of proportionality is taken from the sign of  $\mu$ , hence reveals the effect of the parameter on the objective function direction on average across all tests.
