# Supplementary material
Source: PubMed Central journal article supplement (PMC2072074)
Supplement: biophysj_107.110031_4.pdf [file biophysj_107.110031_4.pdf]

| Parameter  | $\mu^*$ (3 s.f.)<br>$\mu M$ | Proportionality |
|------------|-----------------------------|-----------------|
| $k_{f,16}$ | $1.07 \times 10^{-1}$       | (-)             |
| $R_{pc}$   | $1.00 \times 10^{-1}$       | (+)             |
| $k_{f,15}$ | $5.53 \times 10^{-2}$       | (+)             |
| $k_{f,12}$ | $5.05 \times 10^{-2}$       | (-)             |
| $k_{f,6}$  | $4.81 \times 10^{-2}$       | (+)             |
| $Ca$       | $3.66 \times 10^{-2}$       | (+)             |
| $R$        | $3.60 \times 10^{-2}$       | (+)             |
| $R$        | $3.60 \times 10^{-2}$       | (+)             |
| $k_{f,8}$  | $3.55 \times 10^{-2}$       | (+)             |
| $P_c$      | $3.50 \times 10^{-2}$       | (+)             |
| $k_{f,14}$ | $3.42 \times 10^{-2}$       | (+)             |
| $k_{r,8}$  | $3.41 \times 10^{-2}$       | (-)             |
| $k_{f,10}$ | $3.05 \times 10^{-2}$       | (+)             |
| $PIP2$     | $2.28 \times 10^{-2}$       | (+)             |
| $P$        | $2.08 \times 10^{-2}$       | (+)             |
| $k_{f,9}$  | $1.81 \times 10^{-2}$       | (-)             |
| $R_g$      | $1.29 \times 10^{-2}$       | (+)             |
| $K_{m,14}$ | $1.28 \times 10^{-2}$       | (-)             |
| $k_{f,7}$  | $1.19 \times 10^{-2}$       | (-)             |
| $L_s$      | $8.40 \times 10^{-3}$       | (+)             |
| $K_{m,15}$ | $8.30 \times 10^{-3}$       | (-)             |
| $k_{f,4}$  | $8.00 \times 10^{-3}$       | (+)             |
| $k_{f,5}$  | $7.54 \times 10^{-3}$       | (-)             |
| $k_{r,10}$ | $6.70 \times 10^{-3}$       | (-)             |
| $G_d$      | $5.95 \times 10^{-3}$       | (+)             |
| $K_{d,2}$  | $5.49 \times 10^{-3}$       | (-)             |
| $k_{f,13}$ | $4.95 \times 10^{-3}$       | (-)             |
| $k_{r,9}$  | $2.72 \times 10^{-3}$       | (+)             |
| $K_{d,11}$ | $2.11 \times 10^{-3}$       | (-)             |
| $k_{f,11}$ | $2.09 \times 10^{-3}$       | (-)             |

---

Table S4: Model sensitivity analysis results: Peak Concentration The full list of significant parameters is given. Parameters are ranked by  $\mu^*$ . Additionally, a column depicting whether the parameter is proportional (+) or inversely proportional (-) to the objective function is supplied. The measure of proportionality is taken from the sign of  $\mu$ , hence reveals the effect of the parameter on the objective function direction on average across all tests.
