# Supplementary material
Source: PubMed Central journal article supplement (PMC2072074)
Supplement: biophysj_107.110031_5.pdf [file biophysj_107.110031_5.pdf]

| Parameter  | $\mu^*$ (3 s.f.)      | Proportionality |
|------------|-----------------------|-----------------|
| $k_{f,14}$ | $7.45 \times 10^{-2}$ | (+)             |
| $k_{f,4}$  | $4.13 \times 10^{-2}$ | (-)             |
| $L_s$      | $4.11 \times 10^{-2}$ | (-)             |
| $k_{f,5}$  | $3.62 \times 10^{-2}$ | (+)             |
| $G_d$      | $3.11 \times 10^{-2}$ | (-)             |
| $K_{d,2}$  | $2.66 \times 10^{-2}$ | (+)             |
| $k_{f,12}$ | $9.28 \times 10^{-3}$ | (-)             |
| $k_{f,6}$  | $6.80 \times 10^{-3}$ | (+)             |
| $R$        | $5.10 \times 10^{-3}$ | (+)             |
| $k_{f,10}$ | $5.07 \times 10^{-3}$ | (+)             |
| $k_{f,8}$  | $4.89 \times 10^{-3}$ | (+)             |
| $k_{f,9}$  | $4.44 \times 10^{-3}$ | (-)             |
| $k_{r,8}$  | $4.44 \times 10^{-3}$ | (-)             |
| $R_{pc}$   | $3.39 \times 10^{-3}$ | (+)             |
| $P$        | $3.10 \times 10^{-3}$ | (-)             |
| $Ca$       | $2.81 \times 10^{-3}$ | (-)             |
| $K_{d,11}$ | $2.62 \times 10^{-3}$ | (+)             |
| $k_{f,11}$ | $2.47 \times 10^{-3}$ | (-)             |
| $k_{f,13}$ | $2.35 \times 10^{-3}$ | (+)             |
| $P_c$      | $2.35 \times 10^{-3}$ | (-)             |
| $R_g$      | $1.85 \times 10^{-3}$ | (+)             |
| $k_{f,7}$  | $1.33 \times 10^{-3}$ | (-)             |
| $k_{r,10}$ | $1.20 \times 10^{-3}$ | (-)             |

Table S5: Model sensitivity analysis results: Tau-to-Tail Ratio. The full list of significant parameters is given. Parameters are ranked by  $\mu^*$ . Additionally, a column depicting whether the parameter is proportional (+) or inversely proportional (-) to the objective function is supplied. The measure of proportionality is taken from the sign of  $\mu$ , hence reveals the effect of the parameter on the objective function direction on average across all tests.
