# Supplementary material
Source: PubMed Central journal article supplement (PMC2072074)
Supplement: biophysj_107.110031_6.pdf [file biophysj_107.110031_6.pdf]

| Parameter  | $\mu^*$ (3 s.f.)      | Proportionality |
|------------|-----------------------|-----------------|
|            | $s$                   |                 |
| $k_{f,5}$  | $1.74 \times 10^4$    | (-)             |
| $L_s$      | 2230                  | (-)             |
| $k_{f,4}$  | 2090                  | (-)             |
| $G_d$      | 1680                  | (-)             |
| $K_{d,2}$  | 1390                  | (+)             |
| $k_{f,12}$ | 338                   | (-)             |
| $k_{f,6}$  | 258                   | (+)             |
| $k_{f,8}$  | 198                   | (+)             |
| $R$        | 197                   | (+)             |
| $k_{f,10}$ | 187                   | (+)             |
| $k_{f,9}$  | 177                   | (-)             |
| $k_{r,8}$  | 168                   | (-)             |
| $P$        | 126                   | (-)             |
| $R_{pc}$   | 123                   | (+)             |
| $Ca$       | 110                   | (-)             |
| $k_{f,11}$ | 103                   | (-)             |
| $k_{f,13}$ | 100                   | (+)             |
| $P_c$      | 91.9                  | (-)             |
| $K_{d,11}$ | 90.4                  | (+)             |
| $R_g$      | 69.7                  | (+)             |
| $k_{f,7}$  | 50.1                  | (-)             |
| $k_{r,10}$ | 41.5                  | (-)             |
| $K_{d,4}$  | 35.1                  | (+)             |
| $k_{f,15}$ | 33.6                  | (-)             |
| $k_{r,9}$  | 32.6                  | (+)             |
| $k_{f,1}$  | 31.3                  | (-)             |
| $k_{f,14}$ | 29.0                  | (+)             |
| $K_{m,14}$ | 16.4                  | (-)             |
| $PIP2$     | 8.79                  | (+)             |
| $K_{m,15}$ | 6.55                  | (+)             |
| $k_{f,3}$  | 3.97                  | (-)             |
| $k_{f,2}$  | 3.87                  | (-)             |
| $k_{f,16}$ | 2.43                  | (-)             |
| $k_{r,3}$  | $3.35 \times 10^{-3}$ | (+)             |

---

Table S6: Model sensitivity analysis results: Time-To-Baseline The full list of significant parameters is given. Parameters are ranked by  $\mu^*$ . Additionally, a column depicting whether the parameter is proportional (+) or inversely proportional (-) to the objective function is supplied. The measure of proportionality is taken from the sign of  $\mu$ , hence reveals the effect of the parameter on the objective function direction on average across all tests.
