# Supplementary material
Source: PubMed Central journal article supplement (PMC2072074)
Supplement: biophysj_107.110031_7.pdf [file biophysj_107.110031_7.pdf]

| Ranking | Score                 | Parameter  | Baseline Concentration effect<br>$\mu M$ | Time to Peak effect<br>$s$ | Peak Concentration effect<br>$\mu M$ | Tau to Tail Ratio effect | Time to Baseline effect<br>$s$ |
|---------|-----------------------|------------|------------------------------------------|----------------------------|--------------------------------------|--------------------------|--------------------------------|
| 1       | 2.50                  | $k_{f,5}$  | $\sim 0$                                 | 533                        | $7.54 \times 10^{-3}$                | $3.62 \times 10^{-2}$    | $1.74 \times 10^4$             |
| 2       | 2.20                  | $L_s$      | $\sim 0$                                 | 971                        | $8.40 \times 10^{-3}$                | $4.11 \times 10^{-2}$    | 2230                           |
| 3       | 2.18                  | $k_{f,4}$  | $\sim 0$                                 | 953                        | $7.98 \times 10^{-3}$                | $4.13 \times 10^{-2}$    | 2090                           |
| 4       | 2.00                  | $k_{f,16}$ | $4.54 \times 10^{-2}$                    | 2.43                       | 0.107                                | $9.30 \times 10^{-6}$    | 2.43                           |
| 5       | 2.00                  | $R_{pc}$   | $4.35 \times 10^{-2}$                    | 10.4                       | 0.100                                | $3.39 \times 10^{-3}$    | 123                            |
| 6       | 1.65                  | $G_d$      | $\sim 0$                                 | 725                        | $5.95 \times 10^{-3}$                | $3.11 \times 10^{-2}$    | 1680                           |
| 7       | 1.42                  | $K_{d,2}$  | $\sim 0$                                 | 630                        | $5.49 \times 10^{-3}$                | $2.66 \times 10^{-2}$    | 1390                           |
| 8       | 1.16                  | $k_{f,14}$ | $3.72 \times 10^{-2}$                    | 9.36                       | $3.42 \times 10^{-2}$                | $5.54 \times 10^{-4}$    | 29.0                           |
| 9       | 0.910                 | $k_{f,8}$  | $1.92 \times 10^{-2}$                    | 23.5                       | $3.55 \times 10^{-2}$                | $4.89 \times 10^{-3}$    | 198                            |
| 10      | 0.877                 | $k_{r,8}$  | $1.93 \times 10^{-2}$                    | 13.8                       | $3.41 \times 10^{-2}$                | $4.44 \times 10^{-3}$    | 168                            |
| 11      | $8.27 \times 10^{-1}$ | $Ca$       | $1.83 \times 10^{-2}$                    | 5.34                       | $3.66 \times 10^{-2}$                | $2.81 \times 10^{-3}$    | 110                            |
| 12      | $7.99 \times 10^{-1}$ | $P_c$      | $1.83 \times 10^{-2}$                    | 5.15                       | $3.49 \times 10^{-2}$                | $2.35 \times 10^{-3}$    | 91.9                           |
| 13      | $7.30 \times 10^{-1}$ | $k_{f,12}$ | $\sim 0$                                 | 10.9                       | $5.05 \times 10^{-2}$                | $9.28 \times 10^{-3}$    | 338                            |
| 14      | $7.11 \times 10^{-1}$ | $P$        | $1.87 \times 10^{-2}$                    | 19.7                       | $2.08 \times 10^{-2}$                | $3.10 \times 10^{-3}$    | 126                            |
| 15      | $6.42 \times 10^{-1}$ | $k_{f,6}$  | $\sim 0$                                 | 10.8                       | $4.81 \times 10^{-2}$                | $6.79 \times 10^{-3}$    | 258                            |
| 16      | $5.48 \times 10^{-1}$ | $k_{f,15}$ | $\sim 0$                                 | 11.3                       | $5.53 \times 10^{-2}$                | $6.31 \times 10^{-4}$    | 35.6                           |
| 17      | $5.28 \times 10^{-1}$ | $PIP2$     | $1.39 \times 10^{-2}$                    | 2.41                       | $2.28 \times 10^{-2}$                | $1.99 \times 10^{-4}$    | 8.79                           |
| 18      | $4.81 \times 10^{-1}$ | $R$        | $\sim 0$                                 | 8.6                        | $3.60 \times 10^{-2}$                | $5.10 \times 10^{-3}$    | 197                            |
| 19      | $4.40 \times 10^{-1}$ | $K_{m,14}$ | $1.38 \times 10^{-2}$                    | 5.36                       | $1.28 \times 10^{-2}$                | $4.31 \times 10^{-3}$    | 16.4                           |
| 20      | $4.27 \times 10^{-1}$ | $k_{f,10}$ | $\sim 0$                                 | 6.62                       | $3.05 \times 10^{-2}$                | $5.07 \times 10^{-3}$    | 187                            |
| 21      | $2.93 \times 10^{-1}$ | $k_{f,9}$  | $\sim 0$                                 | 5.28                       | $1.81 \times 10^{-2}$                | $4.44 \times 10^{-3}$    | 177                            |
| 22      | $1.72 \times 10^{-1}$ | $R_g$      | $\sim 0$                                 | 2.73                       | $1.29 \times 10^{-2}$                | $1.85 \times 10^{-3}$    | 69.7                           |
| 23      | $1.51 \times 10^{-1}$ | $k_{f,7}$  | $\sim 0$                                 | 4.14                       | $1.19 \times 10^{-2}$                | $1.33 \times 10^{-3}$    | 50.1                           |
| 24      | $1.13 \times 10^{-1}$ | $k_{f,13}$ | $\sim 0$                                 | 3.81                       | $4.95 \times 10^{-2}$                | $2.35 \times 10^{-3}$    | 99.7                           |
| 25      | $9.58 \times 10^{-2}$ | $k_{r,10}$ | $\sim 0$                                 | 1.42                       | $6.69 \times 10^{-2}$                | $1.20 \times 10^{-3}$    | 41.5                           |
| 26      | $9.52 \times 10^{-2}$ | $K_{d,11}$ | $\sim 0$                                 | 6.43                       | $2.11 \times 10^{-2}$                | $2.62 \times 10^{-3}$    | 90.4                           |
| 27      | $9.18 \times 10^{-2}$ | $k_{f,11}$ | $\sim 0$                                 | 6.24                       | $2.09 \times 10^{-2}$                | $2.47 \times 10^{-3}$    | 103                            |
| 28      | $8.39 \times 10^{-2}$ | $K_{m,15}$ | $\sim 0$                                 | 2.19                       | $8.30 \times 10^{-3}$                | $1.39 \times 10^{-4}$    | 6.55                           |
| 29      | $4.77 \times 10^{-2}$ | $k_{r,9}$  | $\sim 0$                                 | $9.18 \times 10^{-1}$      | $2.72 \times 10^{-3}$                | $7.97 \times 10^{-4}$    | 32.6                           |
| 30      | $1.89 \times 10^{-2}$ | $k_{f,1}$  | $\sim 0$                                 | 8.54                       | $5.65 \times 10^{-5}$                | $3.21 \times 10^{-4}$    | 31.3                           |
| 31      | $1.32 \times 10^{-2}$ | $K_{d,4}$  | $\sim 0$                                 | 1.53                       | $6.18 \times 10^{-5}$                | $3.71 \times 10^{-4}$    | 35.1                           |
| 32      | $5.24 \times 10^{-3}$ | $k_{f,2}$  | $\sim 0$                                 | 2.29                       | $2.18 \times 10^{-5}$                | $1.01 \times 10^{-4}$    | 3.87                           |
| 33      | $1.04 \times 10^{-3}$ | $k_{f,3}$  | $\sim 0$                                 | $1.64 \times 10^{-1}$      | $1.25 \times 10^{-5}$                | $2.17 \times 10^{-5}$    | 3.97                           |
| 34      | $\sim 0$              | $k_{r,3}$  | $\sim 0$                                 | $2.20 \times 10^{-4}$      | $\sim 0$                             | $\sim 0$                 | $3.35 \times 10^{-3}$          |
| 35      | $\sim 0$              | $V_c$      | $\sim 0$                                 | $3.96 \times 10^{-4}$      | $\sim 0$                             | $\sim 0$                 | $4.39 \times 10^{-5}$          |
| 36      | $\sim 0$              | $K_{d,1}$  | $\sim 0$                                 | $4.39 \times 10^{-5}$      | $\sim 0$                             | $\sim 0$                 | 0                              |
| 37      | 0                     | $G_t$      | 0                                        | 0                          | 0                                    | 0                        | 0                              |
| 38      | 0                     | $IP3$      | 0                                        | 0                          | 0                                    | 0                        | 0                              |
| 39      | 0                     | $P_{cg}$   | 0                                        | 0                          | 0                                    | 0                        | 0                              |
| 40      | 0                     | $P_g$      | 0                                        | 0                          | 0                                    | 0                        | 0                              |
| 41      | 0                     | $R_t$      | 0                                        | 0                          | 0                                    | 0                        | 0                              |
| 42      | 0                     | $R_{lg}$   | 0                                        | 0                          | 0                                    | 0                        | 0                              |
| 43      | 0                     | $R_{lgp}$  | 0                                        | 0                          | 0                                    | 0                        | 0                              |

Table S7: Model sensitivity analysis results: Ranked Parameters All parameters of the IP3 submodel are ranked by the sum of their proportion to the largest magnitude effect on each of the five objective functions of the Morris analysis. All values are to three significant figures.
